# Supplementary material
Source: PubMed Central journal article supplement (PMC7194355)
Supplement: NIHMS1583759-supplement-supplemental_online_materal.pdf [file NIHMS1583759-supplement-supplemental_online_materal.pdf]

# Differential methylation of genes in individuals exposed to maternal diabetes in utero

Peng Chen, Paolo Piaggi, Michael Traurig, Clifton Bogardus, William C. Knowler, Leslie J. Baier, Robert L. Hanson

Phoenix Epidemiology and Clinical Research Branch, National Institute of Diabetes and Digestive and Kidney Diseases, National Institutes of Health, 1550 E. Indian School Rd, Phoenix, AZ 85014, USA.

Correspondence should be sent to: Robert L. Hanson, rhanson@phx.niddk.nih.gov

## ESM Methods

### Methylation measurement

DNA (1,000 ng) from peripheral blood leukocytes underwent sodium bisulfite treatment and recovery using the Zymo EZ DNA methylation Kit (Zymo Research, Irvine, CA). Converted DNA was analyzed for complete conversion and quantity by MethyLight [1]. Qualified DNA (15  $\mu$ l) was analyzed using the Infinium HumanMethylation450K Beadchip technology (Illumina Inc., San Diego, CA, USA). The raw signal intensities from the Beadchip were extracted, corrected for background fluorescence and red-green dye bias, using the R (version 3.1.1, <http://www.r-project.org/>) package *methylumi* [2]. The beta value, which measures the extent of methylation at the CpG site covered by a probe, was calculated as  $(m/(m + u))$ , in which  $m$  and  $u$  refer to the mean methylated and unmethylated probe signal intensities respectively. Beta values for which the fluorescent intensity was not significantly above the background signal (detection  $p$  value  $>0.01$ ) were considered missing. Probes whose sequence overlaps with a SNP or indel (minor allele frequency  $>0.5\%$ ), as determined by whole genome sequence data available on 272 Pima Indians, were excluded ( $N = 53,695$  excluded). In addition, probes which directly target SNPs ( $N = 65$ ), align to multiple genomic positions in Human genome build GRCh37.p13 ( $N = 3$ ), map to the Y chromosome ( $N = 32$ ) or provided a call rate  $<95\%$  among all samples ( $N = 8,471$ ) were also removed. The final analysis included 423,311 probes which mapped to an autosome or the X chromosome.

### Mediation analysis

To assess the extent to which observed methylation differences may account for the increased diabetes risk in OMD, a formal mediation analysis was conducted [3]. This involved fitting the following regression models for methylation (M) and development of diabetes (D, by proportional hazards regression):

$$M = a * EXP + \Sigma$$

$$D = c * EXP + \Sigma$$

$$D = b * M + c' * EXP + \Sigma$$

where EXP represents intrauterine exposure (OMD = 1, OMND = 0) and  $\Sigma$  represents the effect of covariates. The significance of the mediation effect was assessed by comparing  $ab$  with its standard error ( $= \text{sqrt}[a * SE_b^2 + b * SE_a^2 + SE_a^2 * SE_b^2]$ ) [3]. Percentage mediation, or the extent to which the excess risk in OMD is potentially explained by the methylation effect, was taken as  $100[1 - c'/c]$  [4].

## ESM Tables

**ESM Table 1. The association of top CpGs with or without adjustment of pre-pregnancy maternal BMI.**

| CpG        | Gene/CpG island                 | Effect | P                     | Effect_mBMI | P_mBMI                |
|------------|---------------------------------|--------|-----------------------|-------------|-----------------------|
| cg21192468 | <i>LHX3</i>                     | 4.8    | 1.7×10 <sup>-08</sup> | 4.5         | 1.3×10 <sup>-07</sup> |
| cg14381623 | <i>LHX3</i>                     | 3.2    | 6.9×10 <sup>-07</sup> | 2.9         | 5.0×10 <sup>-06</sup> |
| cg15796459 | <i>SHROOM2</i>                  | -1.6   | 4.8×10 <sup>-06</sup> | -1.4        | 2.2×10 <sup>-05</sup> |
| cg20749955 | <i>PPP1R3B</i>                  | -3.6   | 1.3×10 <sup>-05</sup> | -2.9        | 3.9×10 <sup>-04</sup> |
| cg12140144 | <i>PRDM16</i>                   | 1.0    | 1.1×10 <sup>-04</sup> | 1.0         | 1.6×10 <sup>-04</sup> |
| cg06717221 | <i>ATP8B3</i>                   | -2.7   | 1.1×10 <sup>-04</sup> | -2.7        | 1.3×10 <sup>-04</sup> |
| cg15833797 | <i>LHX3</i>                     | 2.5    | 6.7×10 <sup>-06</sup> | 2.6         | 1.9×10 <sup>-06</sup> |
| cg14605520 | <i>LHX3</i>                     | 2.8    | 7.6×10 <sup>-05</sup> | 3.0         | 1.5×10 <sup>-05</sup> |
| cg10772621 | <i>chr19:54411376-54411968</i>  | -1.6   | 2.0×10 <sup>-04</sup> | -1.6        | 2.0×10 <sup>-04</sup> |
| cg25952247 | <i>LHX3</i>                     | 3.3    | 3.0×10 <sup>-06</sup> | 3.1         | 1.3×10 <sup>-05</sup> |
| cg20345234 | <i>chr10:65800729-65801528</i>  | -2.3   | 6.6×10 <sup>-05</sup> | -2.1        | 2.3×10 <sup>-04</sup> |
| cg00762450 | <i>ANKRD20A4</i>                | 1.4    | 4.1×10 <sup>-05</sup> | 1.5         | 1.7×10 <sup>-05</sup> |
| cg13700073 | <i>FSCN2</i>                    | -1.7   | 3.0×10 <sup>-05</sup> | -1.6        | 7.1×10 <sup>-05</sup> |
| cg20769177 | <i>WNT9B</i>                    | 2.4    | 9.5×10 <sup>-05</sup> | 2.1         | 6.8×10 <sup>-04</sup> |
| cg08292290 | <i>GLRX5</i>                    | -0.6   | 2.4×10 <sup>-05</sup> | -0.5        | 2.4×10 <sup>-04</sup> |
| cg06268875 | <i>PIEZO2</i>                   | 5.1    | 1.0×10 <sup>-05</sup> | 4.9         | 1.9×10 <sup>-05</sup> |
| cg04350311 | <i>ELFN2</i>                    | 1.5    | 3.2×10 <sup>-04</sup> | 1.4         | 4.4×10 <sup>-04</sup> |
| cg15183961 | <i>ANKRD20A2</i>                | 1.8    | 1.7×10 <sup>-05</sup> | 1.7         | 4.3×10 <sup>-05</sup> |
| cg26671988 | <i>chr5:102090439-102091241</i> | 2.1    | 8.7×10 <sup>-05</sup> | 2.0         | 2.1×10 <sup>-04</sup> |
| cg17186803 | <i>SCN4B</i>                    | 1.2    | 4.1×10 <sup>-04</sup> | 1.2         | 4.8×10 <sup>-04</sup> |
| cg24049468 | <i>AK3</i>                      | 2.3    | 2.8×10 <sup>-04</sup> | 2.4         | 2.2×10 <sup>-04</sup> |
| cg27222147 | <i>CACNA1C</i>                  | -0.7   | 8.7×10 <sup>-04</sup> | -0.6        | 3.5×10 <sup>-03</sup> |
| cg08370430 | <i>chr17:12927455-12928747</i>  | 1.5    | 1.5×10 <sup>-05</sup> | 1.5         | 1.8×10 <sup>-05</sup> |
| cg15618978 | <i>TRIM59</i>                   | 1.5    | 3.3×10 <sup>-05</sup> | 1.4         | 1.5×10 <sup>-04</sup> |
| cg07464358 | -                               | 0.9    | 3.8×10 <sup>-05</sup> | 0.9         | 3.3×10 <sup>-05</sup> |
| cg24996440 | <i>chr2:3583550-3584833</i>     | -2.1   | 4.1×10 <sup>-05</sup> | -1.9        | 1.5×10 <sup>-04</sup> |
| cg03862414 | <i>PLEKHH3</i>                  | 2.4    | 2.2×10 <sup>-05</sup> | 2.2         | 7.7×10 <sup>-05</sup> |
| cg05772155 | <i>chr10:65800729-65801528</i>  | -3.2   | 6.4×10 <sup>-04</sup> | -2.9        | 1.1×10 <sup>-03</sup> |
| cg21172615 | <i>LHX3</i>                     | 2.6    | 1.4×10 <sup>-04</sup> | 2.4         | 4.2×10 <sup>-04</sup> |
| cg20941258 | <i>TDGF1</i>                    | 2.9    | 7.2×10 <sup>-06</sup> | 2.7         | 2.5×10 <sup>-05</sup> |
| cg08414676 | <i>SORD</i>                     | -2.5   | 9.8×10 <sup>-05</sup> | -2.3        | 3.6×10 <sup>-04</sup> |
| cg00509616 | <i>GCOM1</i>                    | 0.9    | 1.9×10 <sup>-03</sup> | 0.9         | 4.1×10 <sup>-03</sup> |
| cg09674170 | <i>CLDN9</i>                    | 3.3    | 1.1×10 <sup>-05</sup> | 3.0         | 1.1×10 <sup>-04</sup> |
| cg07993743 | <i>WNT9B</i>                    | 2.1    | 6.0×10 <sup>-05</sup> | 2.0         | 7.3×10 <sup>-05</sup> |
| cg04645534 | <i>STC1</i>                     | -2.6   | 4.6×10 <sup>-04</sup> | -2.4        | 1.3×10 <sup>-03</sup> |
| cg04413090 | <i>SBK1</i>                     | 1.2    | 6.8×10 <sup>-06</sup> | 0.9         | 3.2×10 <sup>-04</sup> |
| cg13427473 | -                               | -0.7   | 1.6×10 <sup>-04</sup> | -0.7        | 1.6×10 <sup>-04</sup> |

|            |                                |      |                      |      |                      |
|------------|--------------------------------|------|----------------------|------|----------------------|
| cg16426215 | <i>chr16:56709677-56709953</i> | -1.2 | $2.0 \times 10^{-4}$ | -1.0 | $2.6 \times 10^{-3}$ |
| cg24503407 | <i>PM20D1</i>                  | -4.3 | $1.3 \times 10^{-5}$ | -4.0 | $3.1 \times 10^{-5}$ |
| cg12875241 | <i>GPR143</i>                  | 4.0  | $2.8 \times 10^{-4}$ | 3.3  | $2.9 \times 10^{-3}$ |
| cg14732789 | <i>chr20:29534910-29535208</i> | -1.4 | $3.6 \times 10^{-4}$ | -1.4 | $3.8 \times 10^{-4}$ |
| cg14105781 | <i>TBLIX</i>                   | 1.4  | $5.0 \times 10^{-4}$ | 1.1  | $2.2 \times 10^{-3}$ |
| cg08911291 | <i>chr9:44118137-44120175</i>  | 2.6  | $8.9 \times 10^{-5}$ | 2.8  | $3.5 \times 10^{-5}$ |
| cg05806645 | <i>PPP1R3B</i>                 | -2.3 | $1.8 \times 10^{-4}$ | -1.8 | $2.8 \times 10^{-3}$ |
| cg25629768 | <i>LMNB2</i>                   | 1.5  | $1.0 \times 10^{-4}$ | 1.3  | $4.8 \times 10^{-4}$ |
| cg16482344 | <i>LINC00839</i>               | -4.0 | $7.5 \times 10^{-5}$ | -4.0 | $8.6 \times 10^{-5}$ |
| cg25949304 | <i>PCDHGA4</i>                 | -2.7 | $6.5 \times 10^{-4}$ | -2.6 | $1.1 \times 10^{-3}$ |
| cg27073142 | <i>SORD</i>                    | -4.3 | $2.0 \times 10^{-4}$ | -3.7 | $1.0 \times 10^{-3}$ |

All results are shown for the 296 individuals who had data on pre-pregnancy maternal BMI. Effect represents the difference in percentage of DNA methylation in OMD compared with OMND. Effect\_mBMI represents the difference after adjusting for maternal pre-pregnancy BMI (P\_mbmi is the corresponding p value).

**ESM Table 2. Differentially methylated pathways and genes.**

| Pathway            | Enrichment       | Gene symbol    | Gene full name                                                                                 |
|--------------------|------------------|----------------|------------------------------------------------------------------------------------------------|
| Metabolic pathways | O=37;adjP=0.0002 |                |                                                                                                |
|                    |                  | <i>UGP2</i>    | UDP-glucose pyrophosphorylase 2                                                                |
|                    |                  | <i>SORD</i>    | sorbitol dehydrogenase                                                                         |
|                    |                  | <i>XYLT1</i>   | xylosyltransferase I                                                                           |
|                    |                  | <i>PIGH</i>    | phosphatidylinositol glycan anchor biosynthesis, class H                                       |
|                    |                  | <i>NOS1</i>    | nitric oxide synthase 1 (neuronal)                                                             |
|                    |                  | <i>COX4II</i>  | cytochrome c oxidase subunit IV isoform 1                                                      |
|                    |                  | <i>COX10</i>   | COX10 homolog, cytochrome c oxidase assembly protein, heme A: farnesyltransferase (yeast)      |
|                    |                  | <i>PIP5K1C</i> | phosphatidylinositol-4-phosphate 5-kinase, type I, gamma                                       |
|                    |                  | <i>FLAD1</i>   | FAD1 flavin adenine dinucleotide synthetase homolog ( <i>S. cerevisiae</i> )                   |
|                    |                  | <i>DBH</i>     | dopamine beta-hydroxylase (dopamine beta-monoxygenase)                                         |
|                    |                  | <i>ADII</i>    | acireductone dioxygenase 1                                                                     |
|                    |                  | <i>GALNT9</i>  | UDP-N-acetyl-alpha-D-galactosamine:polypeptide N-acetylgalactosaminyltransferase 9 (GalNAc-T9) |
|                    |                  | <i>INPP5A</i>  | inositol polyphosphate-5-phosphatase, 40kDa                                                    |
|                    |                  | <i>ATIC</i>    | 5-aminoimidazole-4-carboxamide ribonucleotide formyltransferase/IMP cyclohydrolase             |
|                    |                  | <i>PAPSS1</i>  | 3'-phosphoadenosine 5'-phosphosulfate synthase 1                                               |
|                    |                  | <i>BDH1</i>    | 3-hydroxybutyrate dehydrogenase, type 1                                                        |
|                    |                  | <i>FUT1</i>    | fucosyltransferase 1 (galactoside 2-alpha-L-fucosyltransferase, H blood group)                 |
|                    |                  | <i>SUCLG2</i>  | succinate-CoA ligase, GDP-forming, beta subunit                                                |
|                    |                  | <i>PTDSS2</i>  | phosphatidylserine synthase 2                                                                  |
|                    |                  | <i>DEGS2</i>   | delta(4)-desaturase, sphingolipid 2                                                            |

|                                  |                  |                   |                                                                                                             |
|----------------------------------|------------------|-------------------|-------------------------------------------------------------------------------------------------------------|
|                                  |                  | <i>NDUFA10</i>    | NADH dehydrogenase (ubiquinone) 1 alpha subcomplex, 10, 42kDa                                               |
|                                  |                  | <i>HSD17B12</i>   | hydroxysteroid (17-beta) dehydrogenase 12                                                                   |
|                                  |                  | <i>SEPHS1</i>     | selenophosphate synthetase 1                                                                                |
|                                  |                  | <i>SUCLA2</i>     | succinate-CoA ligase, ADP-forming, beta subunit                                                             |
|                                  |                  | <i>AK5</i>        | adenylate kinase 5                                                                                          |
|                                  |                  | <i>PSAT1</i>      | phosphoserine aminotransferase 1                                                                            |
|                                  |                  | <i>GUSB</i>       | glucuronidase, beta                                                                                         |
|                                  |                  | <i>BCKDHB</i>     | branched chain keto acid dehydrogenase E1, beta polypeptide                                                 |
|                                  |                  | <i>FUT4</i>       | fucosyltransferase 4 (alpha (1,3) fucosyltransferase, myeloid-specific)                                     |
|                                  |                  | <i>CYP2E1</i>     | cytochrome P450, family 2, subfamily E, polypeptide 1                                                       |
|                                  |                  | <i>GAD2</i>       | glutamate decarboxylase 2 (pancreatic islets and brain, 65kDa)                                              |
|                                  |                  | <i>AKR1D1</i>     | aldo-keto reductase family 1, member D1 (delta 4-3-ketosteroid-5-beta-reductase)                            |
|                                  |                  | <i>CSGALNACT1</i> | chondroitin sulfate N-acetylgalactosaminyltransferase 1                                                     |
|                                  |                  | <i>MDH1</i>       | malate dehydrogenase 1, NAD (soluble)                                                                       |
|                                  |                  | <i>DHCR7</i>      | 7-dehydrocholesterol reductase                                                                              |
|                                  |                  | <i>B4GALT7</i>    | xylosylprotein beta 1,4-galactosyltransferase, polypeptide 7                                                |
|                                  |                  | <i>PSPH</i>       | phosphoserine phosphatase                                                                                   |
| Wnt signaling pathway            | O=11;adjP=0.0004 | <i>SMAD3</i>      | SMAD family member 3                                                                                        |
|                                  |                  | <i>PRKCG</i>      | protein kinase C, gamma                                                                                     |
|                                  |                  | <i>WIF1</i>       | WNT inhibitory factor 1                                                                                     |
|                                  |                  | <i>SFRP2</i>      | secreted frizzled-related protein 2                                                                         |
|                                  |                  | <i>WNT10A</i>     | wingless-type MMTV integration site family, member 10A                                                      |
|                                  |                  | <i>FZD9</i>       | frizzled family receptor 9                                                                                  |
|                                  |                  | <i>WNT7B</i>      | wingless-type MMTV integration site family, member 7B                                                       |
|                                  |                  | <i>TBLIX</i>      | transducin (beta)-like 1X-linked                                                                            |
|                                  |                  | <i>NFATC1</i>     | nuclear factor of activated T-cells, cytoplasmic, calcineurin-dependent 1                                   |
|                                  |                  | <i>CHP2</i>       | calcineurin-like EF hand protein 2                                                                          |
|                                  |                  | <i>WNT9B</i>      | wingless-type MMTV integration site family, member 9B                                                       |
| Protein digestion and absorption | O=8;adjP=0.0005  | <i>ATP1A1</i>     | ATPase, Na+/K+ transporting, alpha 1 polypeptide                                                            |
|                                  |                  | <i>KCNK5</i>      | potassium channel, subfamily K, member 5                                                                    |
|                                  |                  | <i>SLC7A9</i>     | solute carrier family 7 (glycoprotein-associated amino acid transporter light chain, bo,+ system), member 9 |
|                                  |                  | <i>SLC9A3</i>     | solute carrier family 9, subfamily A (NHE3, cation proton antiporter 3), member 3                           |
|                                  |                  | <i>COL18A1</i>    | collagen, type XVIII, alpha 1                                                                               |
|                                  |                  | <i>KCNQ1</i>      | potassium voltage-gated channel, KQT-like subfamily, member 1                                               |
|                                  |                  | <i>SLC6A19</i>    | solute carrier family 6 (neutral amino acid transporter), member 19                                         |

O, the number of differentially methylated genes in the pathway; adjP, the false discovery rate.

**ESM Table 3. Developmental role of the 11 genes among the 39 genes with genome-wide significance.**

| Gene           | Developmental Role                                                                                      | Literature           |
|----------------|---------------------------------------------------------------------------------------------------------|----------------------|
| <i>LHX3</i>    | Motor neuron and interneuron specification<br>Pituitary development<br>Spinal cord development          | [5]<br>[6, 7]<br>[8] |
| <i>PRDM16</i>  | Brown adipocyte tissue mess                                                                             | [9]                  |
| <i>WNT9B</i>   | Kidney tubule development<br>Upper jaw and lip development                                              | [10, 11]<br>[12]     |
| <i>AK3</i>     | Cardiac differentiation                                                                                 | [13]                 |
| <i>CACNA1C</i> | Timothy syndrome<br>skeletal muscle development                                                         | [14]<br>[15]         |
| <i>TDGF1</i>   | Cardiomyogenesis                                                                                        | [16, 17]             |
| <i>STC1</i>    | Growth plate chondrogenesis<br>Osteoblast development and bone formation<br>Bone and muscle development | [18]<br>[19]<br>[20] |
| <i>PM20D1</i>  | Birth weight                                                                                            | [21]                 |
| <i>SBK1</i>    | Brain development                                                                                       | [22]                 |
| <i>TBLIX</i>   | Fetal brain development                                                                                 | [23]                 |
| <i>LMNB2</i>   | Nervous system development                                                                              | [24]                 |

## ESM References

- [1] Campan M, Weisenberger DJ, Trinh B, Laird PW (2009) MethyLight. *Methods in molecular biology* 507: 325-337
- [2] Triche TJ, Jr., Weisenberger DJ, Van Den Berg D, Laird PW, Siegmund KD (2013) Low-level processing of Illumina Infinium DNA Methylation BeadArrays. *Nucleic acids research* 41: e90
- [3] Baron RM, Kenny DA (1986) The moderator-mediator variable distinction in social psychological research: conceptual, strategic, and statistical considerations. *Journal of personality and social psychology* 51: 1173-1182
- [4] Preacher KJ, Kelley K (2011) Effect size measures for mediation models: quantitative strategies for communicating indirect effects. *Psychological methods* 16: 93-115
- [5] Seo SY, Lee B, Lee S (2015) Critical Roles of the LIM Domains of Lhx3 in Recruiting Coactivators to the Motor Neuron-Specifying Isl1-Lhx3 Complex. *Molecular and cellular biology* 35: 3579-3589
- [6] Kelberman D, Dattani MT (2009) Role of transcription factors in midline central nervous system and pituitary defects. *Endocrine development* 14: 67-82
- [7] Colvin SC, Mullen RD, Pfaeffle RW, Rhodes SJ (2009) LHX3 and LHX4 transcription factors in pituitary development and disease. *Pediatric endocrinology reviews* : PER 6 Suppl 2: 283-290

- [8] Park S, Mullen RD, Rhodes SJ (2013) Cell-specific actions of a human LHX3 gene enhancer during pituitary and spinal cord development. *Molecular endocrinology* 27: 2013-2027
- [9] Dempersmier J, Sambeat A, Gulyaeva O, et al. (2015) Cold-inducible Zfp516 activates UCP1 transcription to promote browning of white fat and development of brown fat. *Molecular cell* 57: 235-246
- [10] Karner CM, Chirumamilla R, Aoki S, Igarashi P, Wallingford JB, Carroll TJ (2009) Wnt9b signaling regulates planar cell polarity and kidney tubule morphogenesis. *Nature genetics* 41: 793-799
- [11] Karner CM, Das A, Ma Z, et al. (2011) Canonical Wnt9b signaling balances progenitor cell expansion and differentiation during kidney development. *Development* 138: 1247-1257
- [12] Jin YR, Han XH, Taketo MM, Yoon JK (2012) Wnt9b-dependent FGF signaling is crucial for outgrowth of the nasal and maxillary processes during upper jaw and lip development. *Development* 139: 1821-1830
- [13] Dzeja PP, Chung S, Faustino RS, Behfar A, Terzic A (2011) Developmental enhancement of adenylate kinase-AMPK metabolic signaling axis supports stem cell cardiac differentiation. *PloS one* 6: e19300
- [14] Papineau SD, Wilson S (2014) Dentition abnormalities in a Timothy syndrome patient with a novel genetic mutation: a case report. *Pediatric dentistry* 36: 245-249
- [15] Tanaka H, Furuya T, Kameda N, Kobayashi T, Mizusawa H (2000) Triad proteins and intracellular Ca<sup>2+</sup> transients during development of human skeletal muscle cells in aneural and innervated cultures. *Journal of muscle research and cell motility* 21: 507-526
- [16] D'Aniello C, Lonardo E, Iaconis S, et al. (2009) G protein-coupled receptor APJ and its ligand apelin act downstream of Cripto to specify embryonic stem cells toward the cardiac lineage through extracellular signal-regulated kinase/p70S6 kinase signaling pathway. *Circulation research* 105: 231-238
- [17] Parisi S, D'Andrea D, Lago CT, Adamson ED, Persico MG, Minchiotti G (2003) Nodal-dependent Cripto signaling promotes cardiomyogenesis and redirects the neural fate of embryonic stem cells. *The Journal of cell biology* 163: 303-314
- [18] Wu S, Yoshiko Y, De Luca F (2006) Stanniocalcin 1 acts as a paracrine regulator of growth plate chondrogenesis. *The Journal of biological chemistry* 281: 5120-5127
- [19] Yoshiko Y, Aubin JE, Maeda N (2002) Stanniocalcin 1 (STC1) protein and mRNA are developmentally regulated during embryonic mouse osteogenesis: the potential of stc1 as an autocrine/paracrine factor for osteoblast development and bone formation. *The journal of histochemistry and cytochemistry : official journal of the Histochemistry Society* 50: 483-492
- [20] Jiang WQ, Chang AC, Satoh M, Furuichi Y, Tam PP, Reddel RR (2000) The distribution of stanniocalcin 1 protein in fetal mouse tissues suggests a role in bone and muscle development. *The Journal of endocrinology* 165: 457-466
- [21] Haworth KE, Farrell WE, Emes RD, et al. (2014) Methylation of the FGFR2 gene is associated with high birth weight centile in humans. *Epigenomics* 6: 477-491
- [22] Nara K, Akasako Y, Matsuda Y, et al. (2001) Cloning and characterization of a novel serine/threonine protein kinase gene expressed predominantly in developing brain. *European journal of biochemistry / FEBS* 268: 2642-2651
- [23] Han K, Gennarino VA, Lee Y, et al. (2013) Human-specific regulation of MeCP2 levels in fetal brains by microRNA miR-483-5p. *Genes & development* 27: 485-490
- [24] Coffinier C, Chang SY, Nobumori C, et al. (2010) Abnormal development of the cerebral cortex and cerebellum in the setting of lamin B2 deficiency. *Proceedings of the National Academy of Sciences of the United States of America* 107: 5076-5081
